# Supplementary material
Source: PubMed Central journal article supplement (PMC4535339)
Supplement: NIHMS703761-supplement-SI.pdf [file NIHMS703761-supplement-SI.pdf]

# Substrate-Protein Interaction in Human Tryptophan

## Dioxygenase: The Critical Role of H76

*Dipanwita Batabyal and Syun-Ru Yeh\**

**Supporting Information Available:** Complete Ref. 21 and supporting figures. This material is available free of charge via the Internet at <http://pubs.acs.org>."

Complete Ref.21: Forouhar, F.; Anderson, J. L.; Mowat, C. G.; Vorobiev, S. M.; Hussain, A.; Abashidze, M.; Bruckmann, C.; Thackray, S. J.; Seetharaman, J.; Tucker, T.; Xiao, R.; Ma, L. C.; Zhao, L.; Acton, T. B.; Montelione, G. T.; Chapman, S. K.; Tong, L., Molecular insights into substrate recognition and catalysis by tryptophan 2,3-dioxygenase. *Proc Natl Acad Sci U S A* 2007, 104, (2), 473-8.

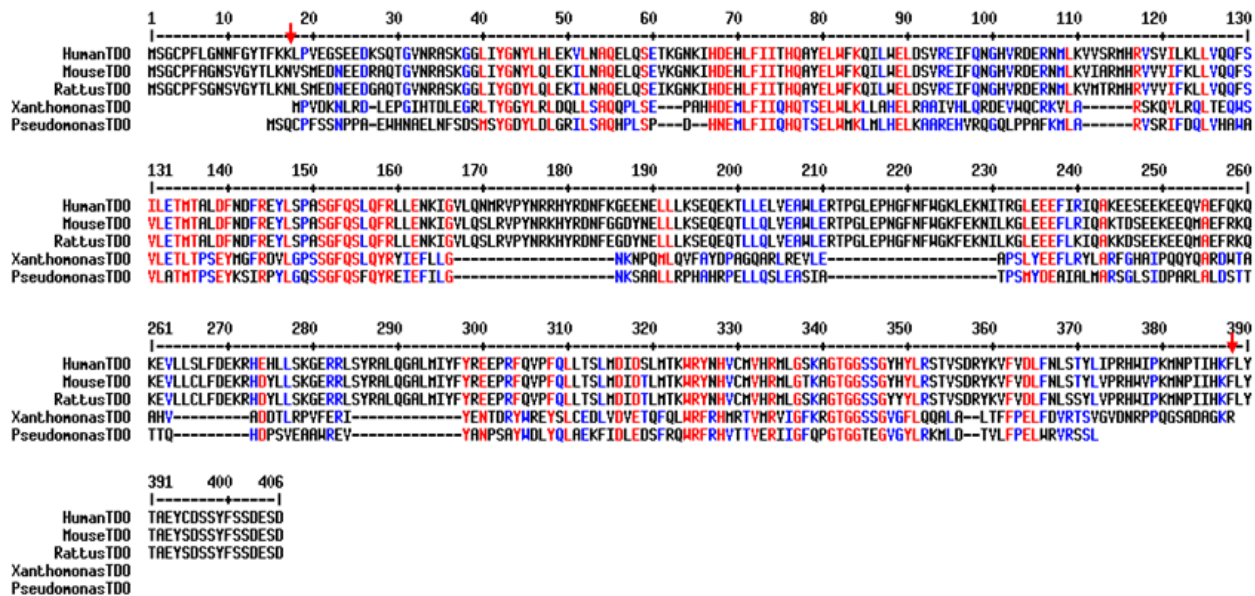

**Figure S1. Sequence alignment of hTDO with TDOs from other organisms.** The DNA sequences from human (*H. sapiens*), mouse (*M. musculus*), rat (*R. norvegicus*), and bacteria (*X. campestris* and *P. fluorescens*) are aligned with a web-based software (Multalin version 5.4.1.).<sup>55</sup> The residues labeled in red and blue indicate 90% and 50% consensus levels, respectively. The truncation positions for the hTDO used for this work are indicated by the arrows.

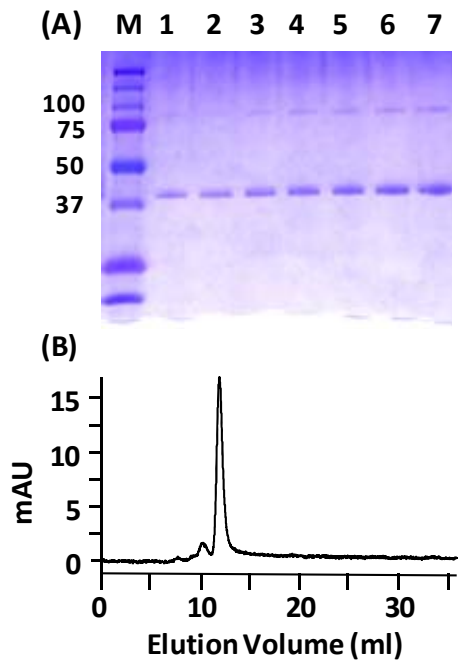

**Figure S2. Characterization of the purified hTDO protein sample.** In (A), the 12 % SDS-PAGE data show the purified hTDO loaded in increasing concentrations (lanes 1-7), demonstrating the purity of the enzyme. The lane labeled as M is from molecular markers (Bio-Rad); the 37, 50, 75 and 100 kD bands are used as molecular weight references. For the hIDO sample, a higher molecular weight band visible at ~ 85 kD is attributed to residual dimeric form of hTDO. Similar bands have been reported for rat liver TDO.<sup>35, 56</sup> The assignment of the bands to hTDO were confirmed by western blot analysis, with an anti-histidine antibody (Roche). In (B), the elution profile (monitored at 407 nm) of the purified protein obtained from a size-exclusion column (Superdex 200) shows that the majority of the enzyme elutes at ~12 ml, confirming that the enzyme was purified to near homogeneity.

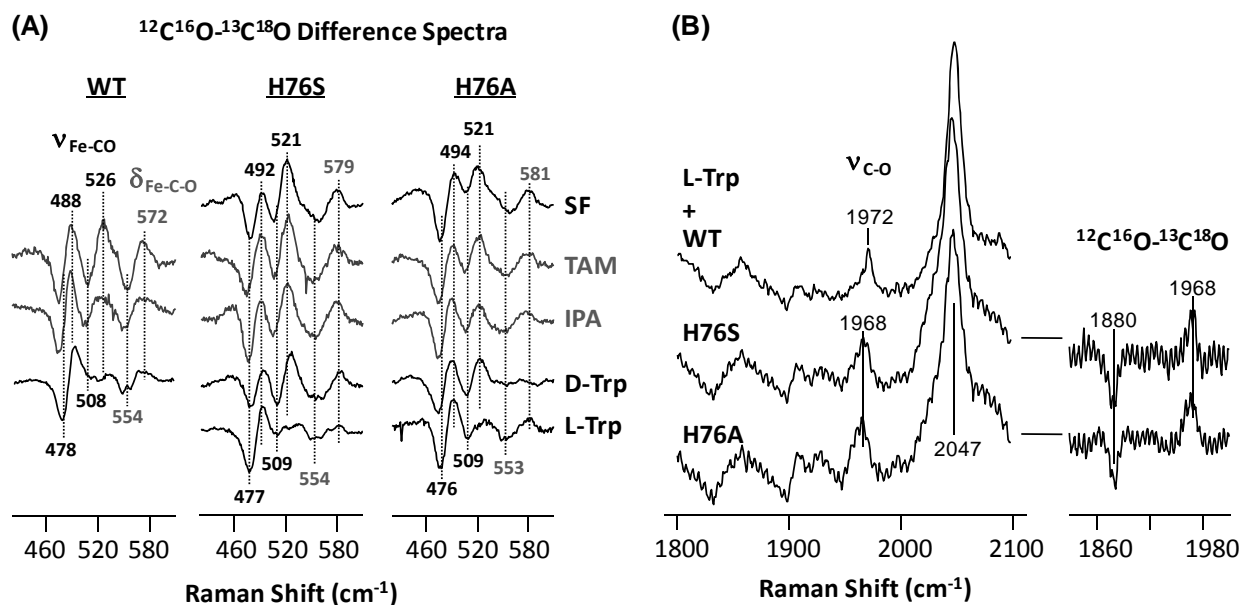

**Figure S3. (A) The  $^{12}\text{C}^{16}\text{O}$ - $^{13}\text{C}^{18}\text{O}$  isotope difference spectra associated with the  $\nu_{\text{Fe-CO}}$  modes of the wild type and the H76S and H76A mutants of hTDO in the presence and absence of Trp or Trp analogs. (B) The  $\nu_{\text{C-O}}$  modes of the wild type and the H76S and H76A mutants of L-Trp-bound hTDO, and their associated  $^{12}\text{C}^{16}\text{O}$ - $^{13}\text{C}^{18}\text{O}$  isotope difference spectra. The conditions are the same as those described in Fig. 7. In the difference spectra all the heme modes are cancelled out; the remaining positive and negative peaks are associated with  $^{12}\text{C}^{16}\text{O}$  and  $^{13}\text{C}^{18}\text{O}$ , respectively. Isotope difference spectra of the substrate-free and L-Trp-bound wild type hTDO are not shown, as they have been reported elsewhere.<sup>24</sup> The numbers labeled in gray in (A) are the associated Fe-C-O bending modes ( $\delta_{\text{Fe-C-O}}$ ).**

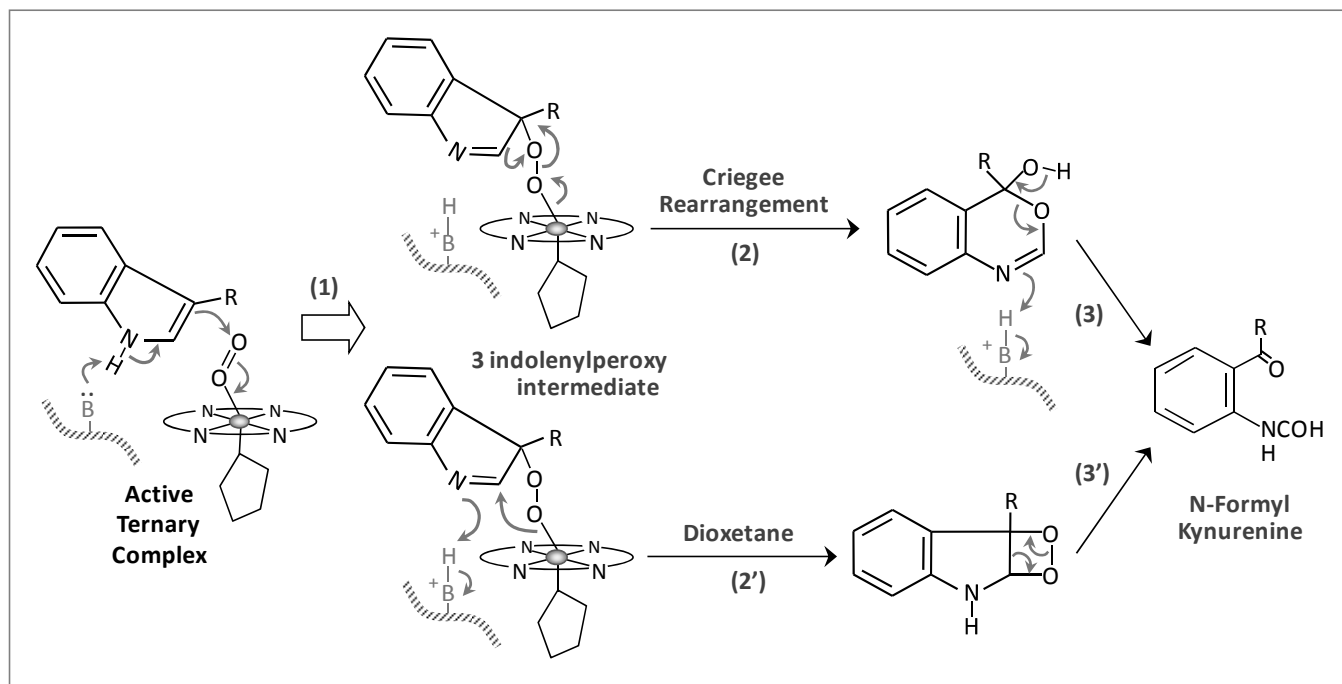

**Figure S4.** The postulated dioxygenase mechanisms of TDO and IDO. The mechanisms are described in the text.
